# Supplementary material
Source: PubMed Central journal article supplement (PMC10193504)
Supplement: SupplementalMethodsandTables_JNS20-2277.pdf [file SupplementalMethodsandTables_JNS20-2277.pdf]

ONLINE ONLY

## Supplemental material

### Symptom-specific differential motor network modulation by deep brain stimulation in Parkinson's disease

Gibson et al.

<https://thejns.org/doi/abs/10.3171/2020.10.JNS202277>

**DISCLAIMER** The *Journal of Neurosurgery* acknowledges that the following section is published verbatim as submitted by the authors and did not go through either the *Journal's* peer-review or editing process.

## **Supplemental Methods**

### **Functional Magnetic Resonance Imaging Procedure**

Average head specific absorption rate (SAR) values of  $<0.1$  W/kg were recorded during the fMRI study in all the patients, and a board-certified MRI physicist with expertise in MRI for patients with implanted electronic devices was present during all the sessions (Gorny et al., 2013). An anesthesia team was also present during all sessions and vital signs were continuously monitored. For all sequences, a manufacturer's standard transmit/receive RF head coil was used (1.5-T quadrature head coil, model 46-28211862; GE Healthcare). fMRI scans were then conducted using a block design as stated in the main text. Following fMRI, patients were returned to the operating room for pulse generator implantation.

### **Clinical Evaluation**

Tremor scores were calculated as the sum of contralateral upper extremity resting tremor, lower extremity resting tremor, and upper extremity action tremor scores (0-12). Rigidity scores were calculated as the sum of contralateral upper and lower extremity rigidity scores (0-8). Bradykinesia scores were calculated as the sum of contralateral rapid finger tapping, hand movement (opening/closing fist), upper extremity rapid alternating movement, and rapid heel tapping (0-16). Any patient-reported adverse effects prior to reaching 3V were recorded for each setting, and a short 3-5 minute washout period was allowed between settings. All four settings were interrogated in a single session to minimize inter-session error and patient discomfort.

Supplemental Table 1: Subjects and Therapeutic Responses to DBS

| Case | Age/Gender | Handedness | Preoperative medication (LDE – mg) | DBS status          | Off-medication contralateral UPDRS III subscores |                |              |              |
|------|------------|------------|------------------------------------|---------------------|--------------------------------------------------|----------------|--------------|--------------|
|      |            |            |                                    |                     | Total                                            | Tremor         | Rigidity     | Bradykinesia |
| 1    | 64M        | R          | 2760                               | Off                 | 16                                               | 2              | 5            | 9            |
|      |            |            |                                    | *On: 0-; 1-; 2-; 3V | 12; 9.5; 10.5; 11                                | 2; 1.5; 0.5; 1 | 3; 3; 4; 3.5 | 7; 5; 6; 6   |
| 2    | 75F        | R          | 1890                               | Off                 | 17                                               | 3              | 2            | 12           |
|      |            |            |                                    | On: 0-; 1-; 2-; 3V  | 11; 8; 11; 10                                    | 4; 3; 1; 1     | 0; 0; 2; 2   | 7; 5; 8; 7   |
| 3    | 57F        | R          | 935                                | Off                 | 8                                                | 4              | 0            | 4            |
|      |            |            |                                    | On: 0-; 1-; 2-; 3V  | 2; 1; 1; 5                                       | 2; 0; 0; 4     | 0; 0; 0; 0   | 0; 1; 1; 1   |
| 4    | 37F        | R          | 1200                               | Off                 | 12                                               | 1              | 3            | 8            |
|      |            |            |                                    | On: 0-; 1-; 2-; 3V  | 9; 11; 3; 3                                      | 1; 1; 0; 0     | 3; 2; 1; 1   | 5; 8; 2; 2   |
| 5    | 60F        | L          | 1100                               | Off                 | 16                                               | 7              | 3            | 6            |
|      |            |            |                                    | On: 0-; 1-; 2-; 3V  | 16; 9; 15; 8                                     | 7; 3; 6; 2     | 3; 1; 3; 1   | 6; 5; 6; 5   |
| 6    | 72F        | R          | 600                                | Off                 | 12                                               | 5              | 3            | 4            |
|      |            |            |                                    | On: 0-; 1-; 2-; 3V  | 6; 3; 3; 3                                       | 0; 0; 0; 0     | 2; 2; 1; 2   | 4; 1; 2; 1   |

|    |     |   |      |                       |             |            |            |             |
|----|-----|---|------|-----------------------|-------------|------------|------------|-------------|
| 7  | 56M | R | 1500 | Off                   | 7           | 4          | 1          | 2           |
|    |     |   |      | On: 0-; 1-; 2-;<br>3V | 2; 3; 3; 2  | 2; 2; 1; 2 | 0; 0; 0; 0 | 0; 1; 2; 0  |
| 8  | 46F | R | 2930 | Off                   | 4           | 1          | 1          | 2           |
|    |     |   |      | On: 0-; 1-; 2-;<br>3V | 1; 2; 2; 6  | 0; 0; 1; 3 | 0; 0; 0; 1 | 1; 2; 1; 2  |
| 9  | 71M | R | 0    | Off                   | 12          | 7          | 3          | 2           |
|    |     |   |      | On: 0-; 1-; 2-;<br>3V | 7; 8; 5; 11 | 5; 2; 2; 6 | 2; 3; 2; 3 | 0; 3; 1; 2  |
| 10 | 67M | R | 2300 | Off                   | 4           | 1          | 2          | 1           |
|    |     |   |      | On: 0-; 1-; 2-;<br>3V | 1; 1; 0; 1  | 0; 0; 0; 0 | 1; 0; 0; 1 | 0; 1; 0; 0  |
| 11 | 83F | R | 0    | Off                   | 10          | 0          | 3          | 7           |
|    |     |   |      | On: 0-; 1-; 2-;<br>3V | 10; 6; 5; 5 | 0; 0; 0; 0 | 3; 2; 1; 1 | 7; 4; 4; 4  |
| 12 | 47M | R | 1100 | Off                   | 10          | 1          | 4          | 5           |
|    |     |   |      | On: 0-; 1-; 2-;<br>3V | 19; 5; 7; 6 | 1; 1; 1; 0 | 4; 1; 2; 2 | 14; 3; 4; 4 |
| 13 | 64F | R | 1330 | Off                   | 10          | 5          | 0          | 5           |
|    |     |   |      | On: 0-; 1-; 2-;<br>3V | 0; 2; 2; 9  | 0; 0; 1; 4 | 0; 0; 0; 0 | 0; 2; 1; 5  |
| 14 | 55M | R | 0    | Off                   | 9           | 4          | 2          | 3           |
|    |     |   |      | On: 0-; 1-; 2-;<br>3V | 9; 6; 2; 6  | 4; 1; 0; 3 | 2; 2; 0; 2 | 3; 3; 2; 1  |
| 15 | 74M | R | 1400 | Off                   | 6           | 2          | 0          | 5           |

|    |     |   |      |                       |            |            |            |            |
|----|-----|---|------|-----------------------|------------|------------|------------|------------|
|    |     |   |      | On: 0-; 1-; 2-;<br>3V | 5; 5; 5; 5 | 1; 1; 1; 1 | 0; 0; 0; 0 | 4; 4; 4; 4 |
| 16 | 71M | R | 300  | Off                   | /          | /          | /          | /          |
|    |     |   |      | On: 0-; 1-; 2-;<br>3V | /          | /          | /          | /          |
| 17 | 58F | R | 800  | Off                   | 6          | 5          | 0          | 1          |
|    |     |   |      | On: 0-; 1-; 2-;<br>3V | /          | /          | /          | /          |
| 18 | 55F | R | 1400 | Off                   | 18         | 5          | 1          | 12         |
|    |     |   |      | On: 0-; 1-; 2-;<br>3V | /          | /          | /          | /          |
| 19 | 75M | R | 900  | Off                   | 16         | 6          | 4          | 6          |
|    |     |   |      | On: 0-; 1-; 2-;<br>3V | /          | /          | /          | /          |
| 20 | 64F | R | 1260 | Off                   | 12         | 2          | 1          | 9          |
|    |     |   |      | On: 0-; 1-; 2-;<br>3V | /          | /          | /          | /          |

LDE = levodopa dosage equivalent (in mg); Contralateral mUPDRS subscores given for unilateral DBS on at 3V (or maximum side effect-free voltage), 90  $\mu$ s, 130 Hz, monopolar stimulation with the following active contacts: 0-; 1-; 2-; 3V (four DBS “on” evaluations per patient)

**Supplemental Table 2: Regions of Interest from group activation map**

| Region                              | x*  | y* | z*  | Peak t | Volume (voxels) |
|-------------------------------------|-----|----|-----|--------|-----------------|
| Cerebellum (C)                      | 8   | 65 | -19 | 9.68   | 10616           |
| Precentral gyrus (lateral – I)      | -40 | 23 | 56  | 6.71   | 6163            |
| Thalamus (I)                        | -14 | 15 | 10  | 11.04  | 2263            |
| Midbrain (I)                        | -7  | 26 | -4  | 8.65   | 1949            |
| Insula/striatum (I)                 | -41 | -9 | 3   | -5.76  | 1847            |
| Occipital/posterior cingulate (I/C) | -5  | 78 | 4   | 5.10   | 1717            |
| Cerebellum (I)                      | -14 | 58 | -24 | 5.26   | 1528            |
| Precentral gyrus (medial – I)       | 9   | 34 | 63  | -13.15 | 729             |
| Pons                                | -3  | 34 | -32 | 720    | 356             |

\*Peak voxel – Talairach coordinates

**Supplemental Table 3: Regions of Interest from side effect maps**

| Contrast                           | Region               | x*  | y*  | z*  | Peak t | Volume (voxels) |
|------------------------------------|----------------------|-----|-----|-----|--------|-----------------|
| Dystonia > no S.E.                 | Striatum (I)         | -17 | 18  | 23  | 3.86   | 736             |
| Paresthesia > no S.E.              | Precentral gyrus (I) | -44 | 9   | 22  | 5.72   | 1949            |
|                                    | Prefrontal (C)       | 26  | -39 | 44  | 5.28   | 831             |
|                                    | Cerebellum (C)       | 15  | 60  | -23 | 4.26   | 897             |
|                                    | Cerebellum (I)       | -12 | 60  | -20 | 4.60   | 695             |
| Nausea + lightheadedness > no S.E. | Cerebellum (C)       | 5   | 66  | -17 | 7.39   | 5028            |
|                                    | Precentral gyrus (I) | -47 | 12  | 26  | 5.06   | 720             |
